# Supplementary material for: Three-Dimensional Au/Ag Nanoparticle/Crossed Carbon Nanotube SERS Substrate for the Detection of Mixed Toxic Molecules
Source: MDPI journal article supplement (doi:10.3390/nano11082026), 2021-08-09
Supplement: s1 [file s1]

# Three-Dimensional Au/Ag Nanoparticle/Crossed Carbon Nanotube SERS Substrate for the Detection of Mixed Toxic Molecules

Haonan Wei <sup>1,2</sup>, Zhisheng Peng <sup>2</sup>, Cheng Yang <sup>1</sup>, Yuan Tian <sup>1</sup>, Lianfeng Sun <sup>2,\*</sup>, Gongtang Wang <sup>1,\*</sup>, and Mei Liu <sup>1,\*</sup>

- <sup>1</sup> School of Physics and Electronics, Shandong Normal University, Jinan 250358, China; 2018020530@stu.sdnu.edu.cn (H.W.); chengyang@sdnu.edu.cn (C.Y.); 2018020524@stu.sdnu.edu.cn (Y.T.)  
<sup>2</sup> CAS Key Laboratory of Nanosystem and Hierarchical Fabrication, CAS Center for Excellence in Nanoscience, National Center for Nanoscience and Technology, Beijing 100190, China; pengzs2018@nanoctr.cn  
 \* Correspondence: slf@nanoctr.cn (L.S.); wanggt@sdnu.edu.cn (G.W.); liumei@sdnu.edu.cn (M.L.)

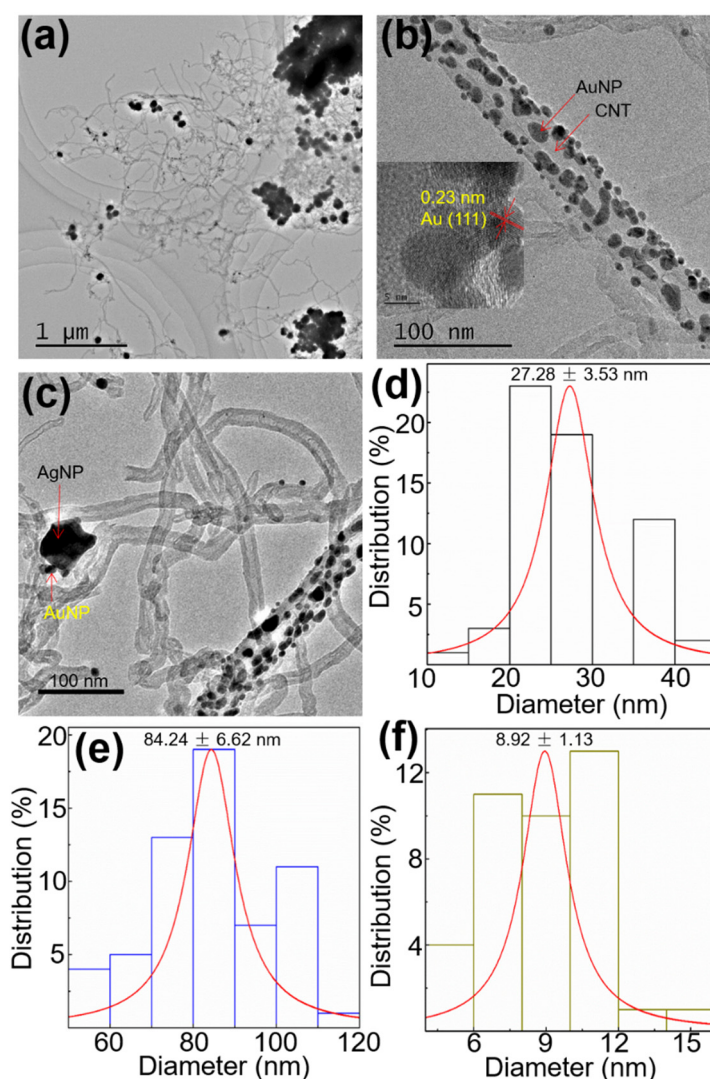

**Figure S1.** (a), (b) and (c) TEM images of the Au/AgNPs/crossed CNTs film. (c) Diameter distribution of (d) CNTs, (e) AgNPs and (f) AuNPs, respectively.

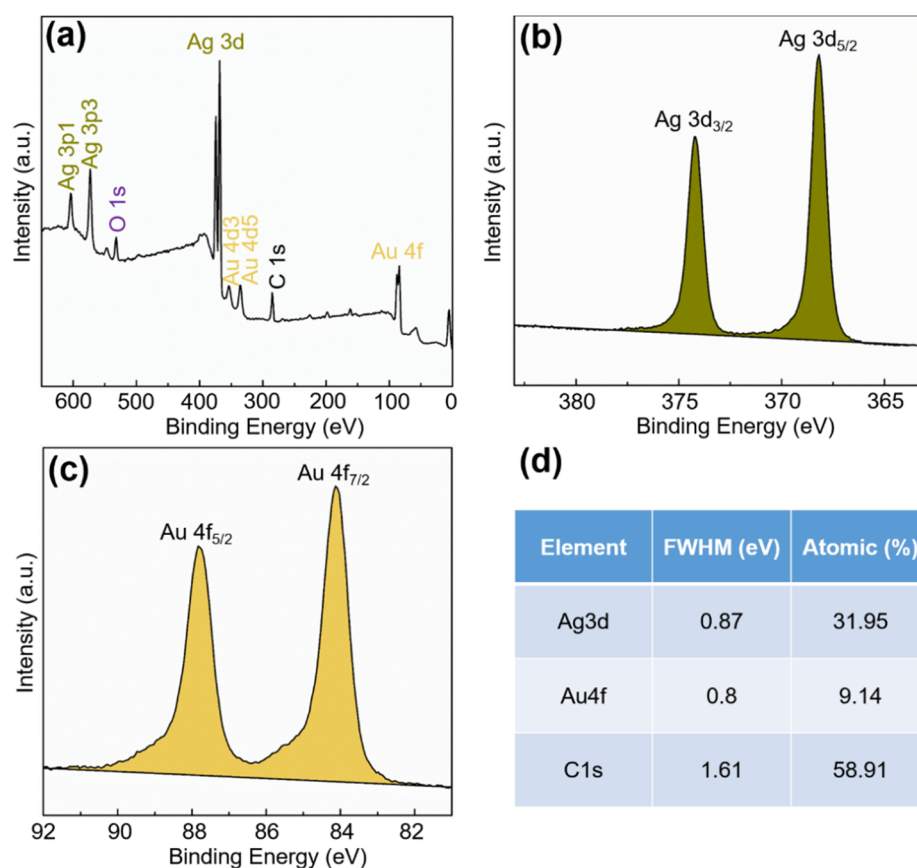

**Figure S2.** XPS spectra of (a) survey, (b) Ag 3d, (c) Au 4f of Au/AgNPs/crossed CNTs film, (d) the corresponding percentage of element content.

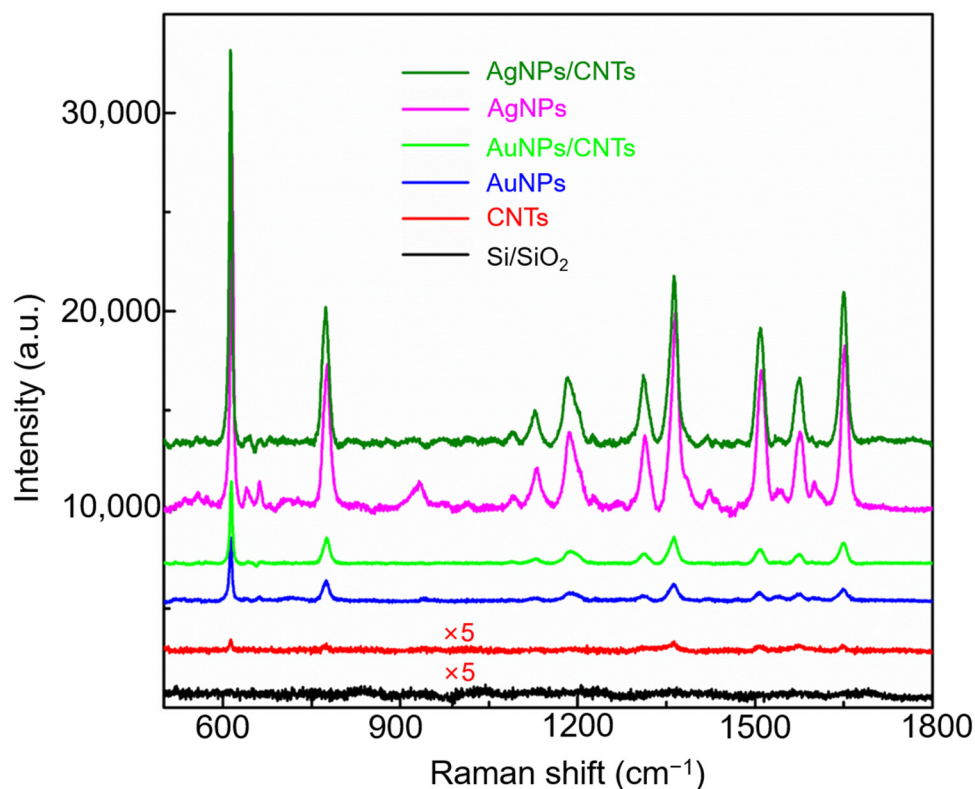

**Figure S3.** Raman spectra of R6G molecules ( $10^{-5}$  M) detected on Si/SiO<sub>2</sub>, CNTs/Si/SiO<sub>2</sub>, AuNPs/Si/SiO<sub>2</sub>, AuNPs/crossed CNTs film, AgNPs/Si/SiO<sub>2</sub>, AgNPs/crossed CNTs film.

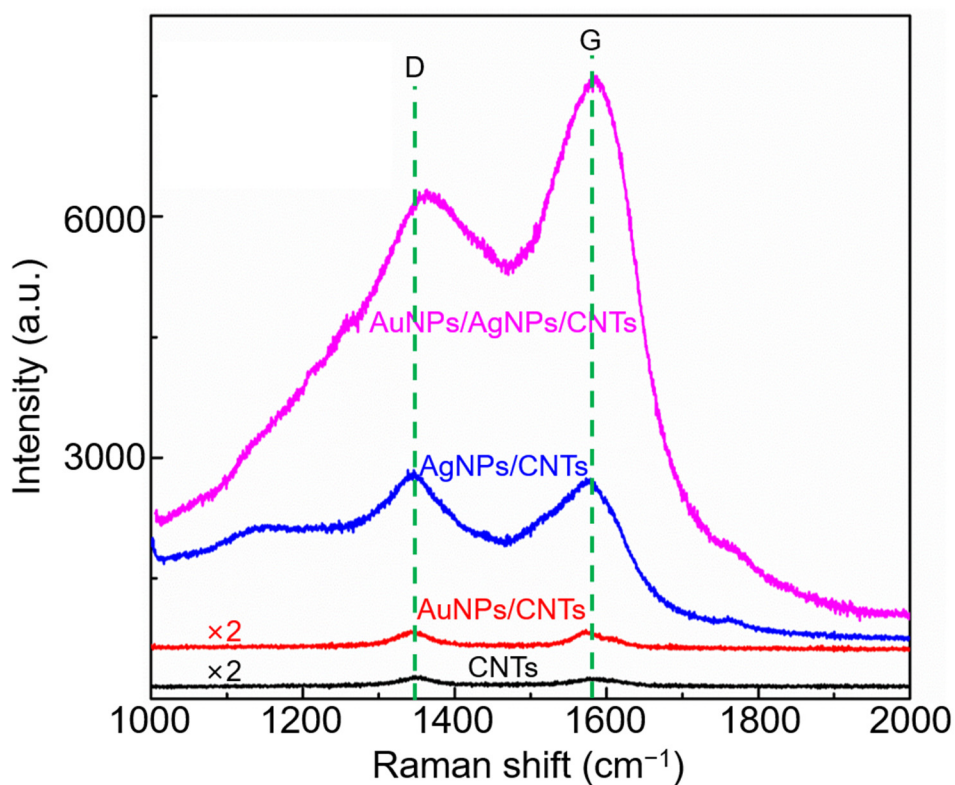

**Figure S4.** Raman spectra of CNTs on the crossed CNTs film, AuNPs/crossed CNTs film, AgNPs/crossed CNTs film and Au/AgNPs/crossed CNTs film.

**Table S1.** The vibrational mode of various peaks for R6G.

| Raman shifts (cm <sup>-1</sup> ) | Vibrational mode                 |
|----------------------------------|----------------------------------|
| 614                              | C-C-C ring in-plane bending mode |
| 774                              | C-H out-of-plane bending mode    |
| 1182                             | C-H in-plane bending mode        |
| 1310                             | aromatic C-C stretching mode     |
| 1363                             |                                  |
| 1509                             |                                  |
| 1651                             |                                  |
